# Supplementary material for: A high-resolution simulation of groundwater and surface water over most of the continental US with the integrated hydrologic model ParFlow v3
Source: Copernicus journal article supplement (doi:10.5194/gmd-8-923-2015), 2015-03-31

**a. Pacific Northwest (439 Points)**

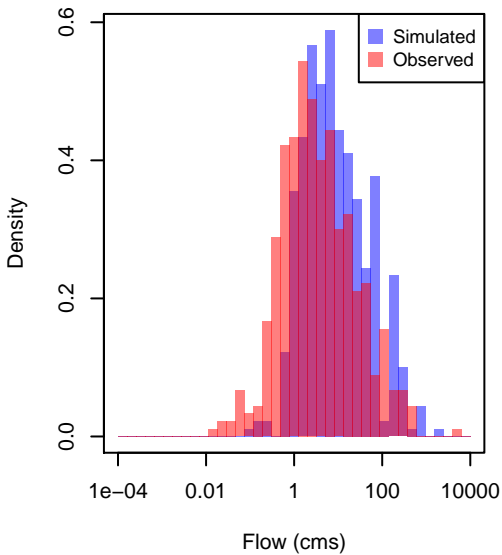

**b. Missouri (1027 Points)**

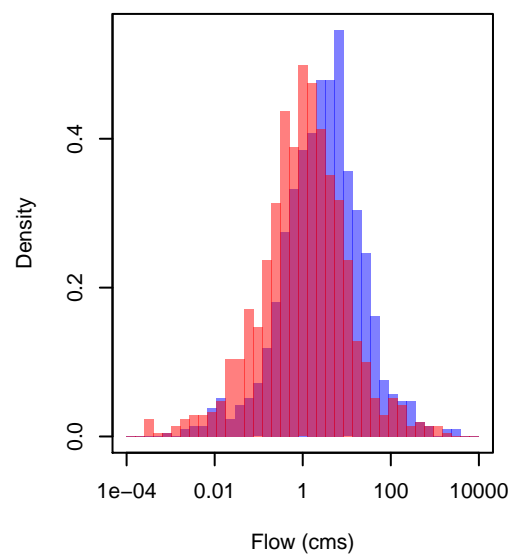

**c. Upper Mississippi (357 Points)**

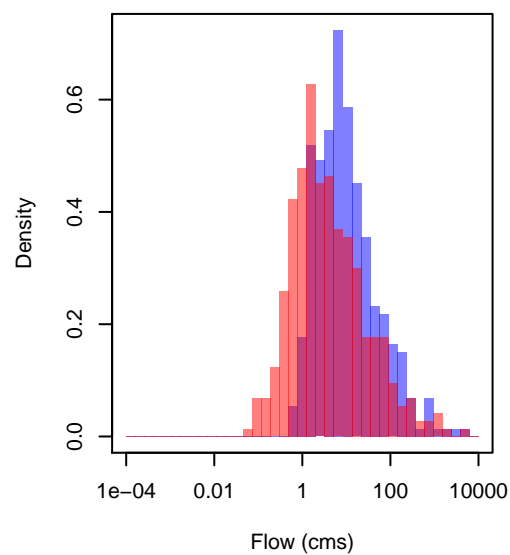

**d. Great Basin (117 Points)**

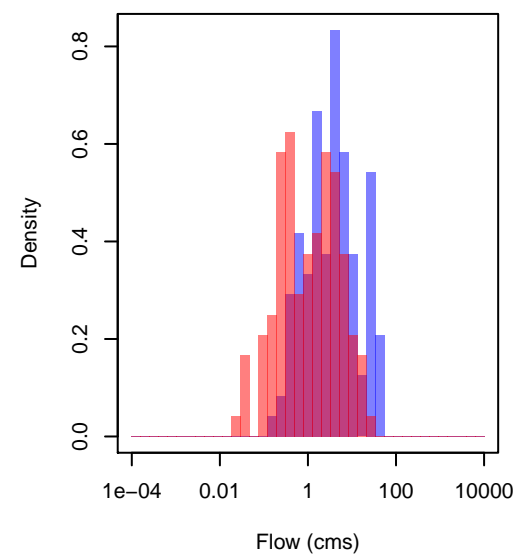

**e. Upper Colorado (351 Points)**

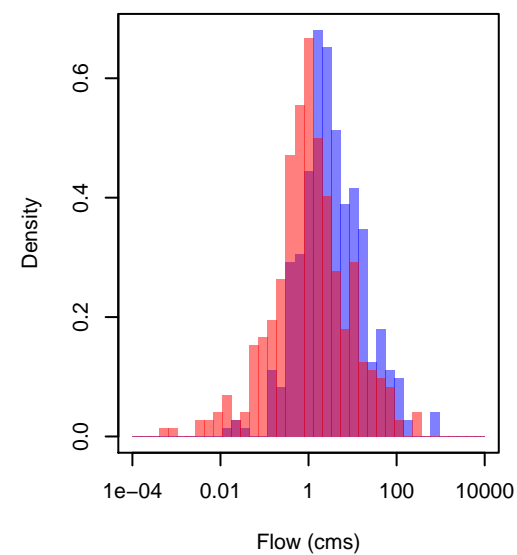

**f. Ohio (413 Points)**

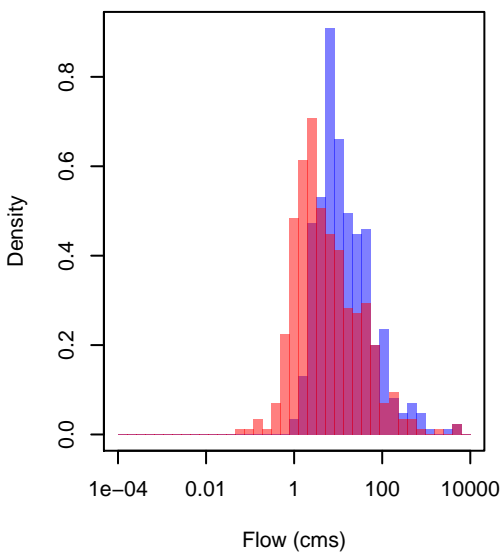

**g. Lower Colorado (135 Points)**

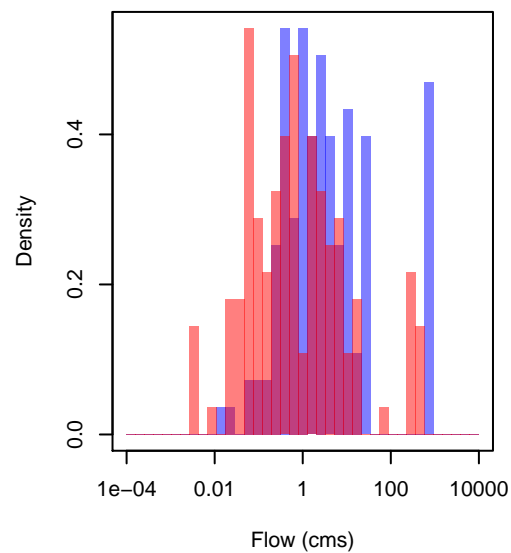

**h. Arkansas-White-Red (502 Points)**

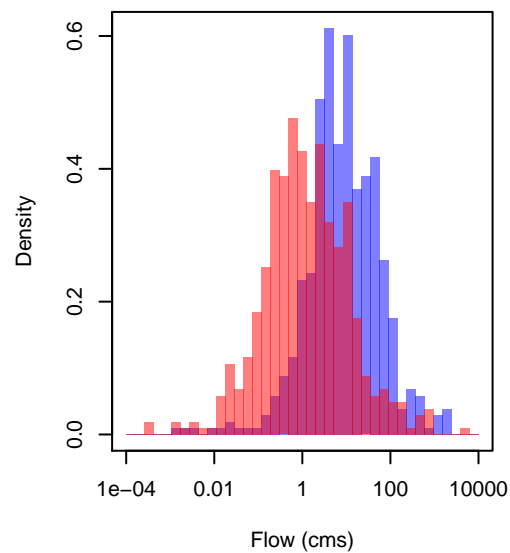

**i. Other Areas (829 Points)**

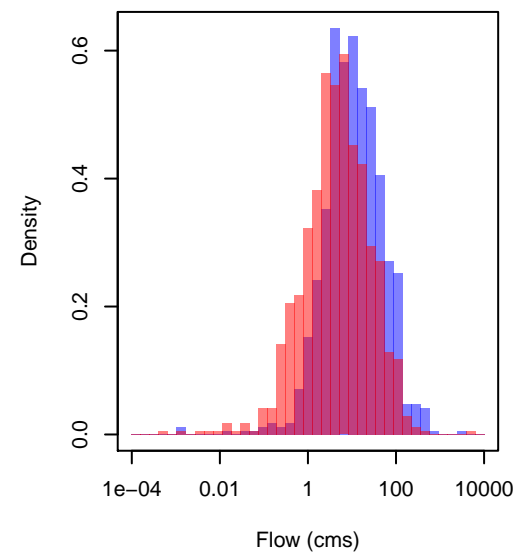

Supplement: Supplementary file 2 [file Figure7.pdf › final-figures/Figure7.pdf]
