# Supplementary material for: A high-resolution simulation of groundwater and surface water over most of the continental US with the integrated hydrologic model ParFlow v3
Source: Copernicus journal article supplement (doi:10.5194/gmd-8-923-2015), 2015-03-31

**a. Pacific Northwest (1358 Points)**

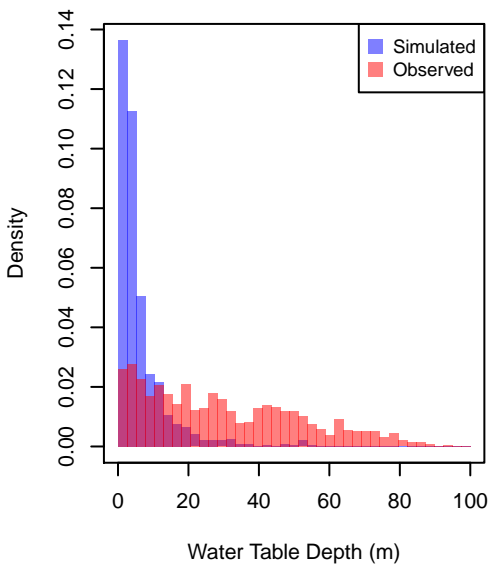

**b. Missouri (24082 Points)**

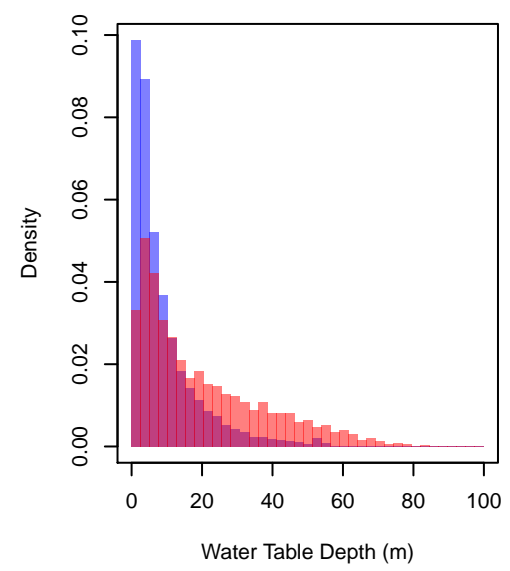

**c. Upper Mississippi (3502 Points)**

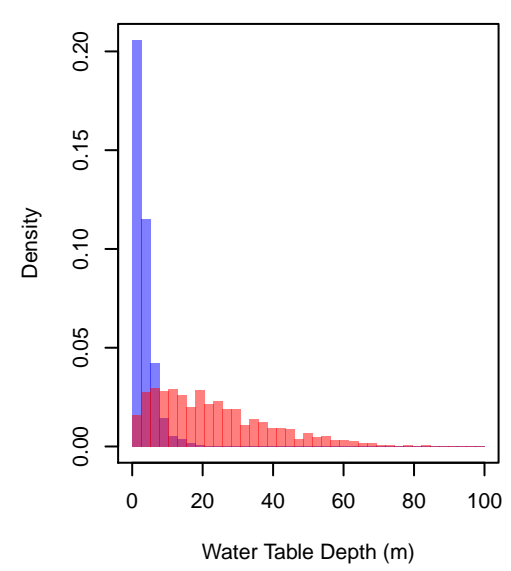

**d. Great Basin (1632 Points)**

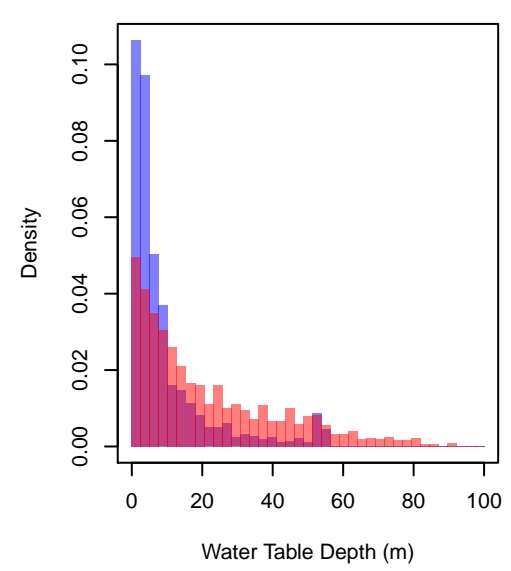

**e. Upper Colorado (1203 Points)**

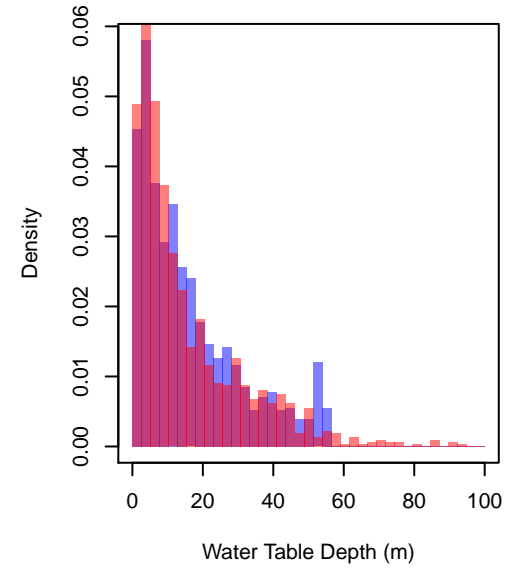

**f. Ohio (491 Points)**

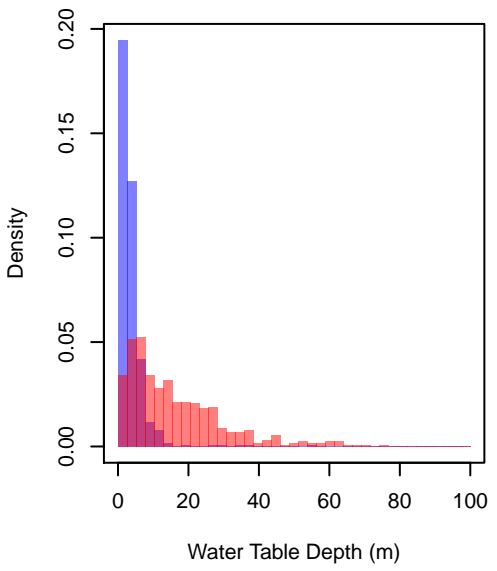

**g. Lower Colorado (2882 Points)**

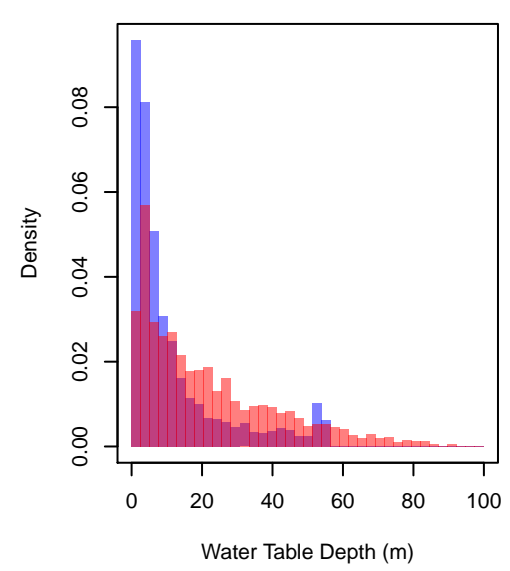

**h. Arkansas-White-Red (7363 Points)**

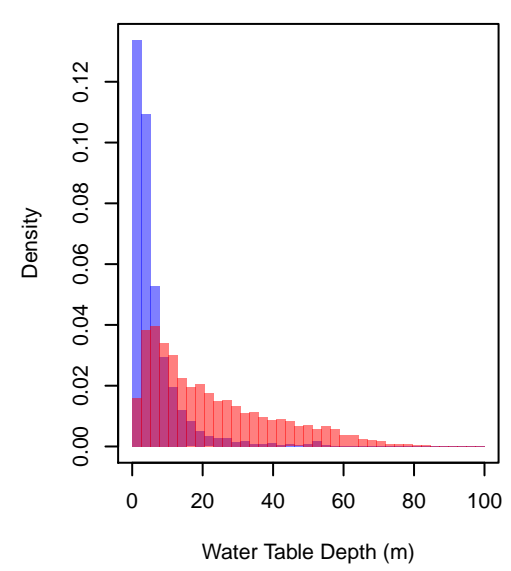

**i. Other Areas (2828 Points)**

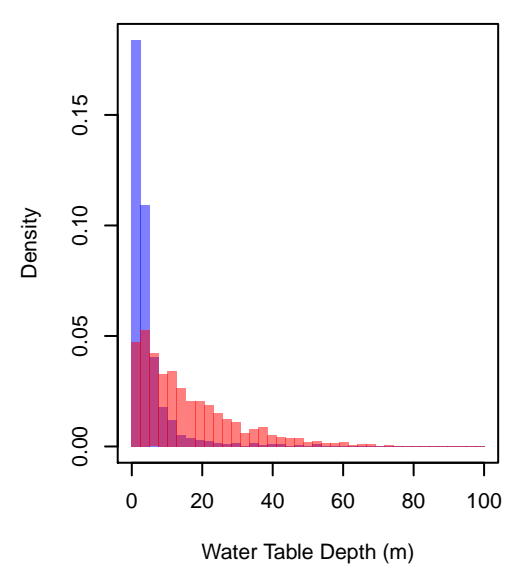

Supplement: Supplementary file 3 [file Figure8.pdf › final-figures/Figure8.pdf]
