# Supplementary material for: A high-resolution simulation of groundwater and surface water over most of the continental US with the integrated hydrologic model ParFlow v3
Source: Copernicus journal article supplement (doi:10.5194/gmd-8-923-2015), 2015-03-31
Supplement: Supplementary file 4 [file gmd-8-923-2015-supplement-cover-letter.pdf › gmd-8-923-2015-supplement-cover-letter.pdf]

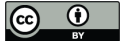

## *Supplement of*

# **A high-resolution simulation of groundwater and surface water over most of the continental US with the integrated hydrologic model ParFlow v3**

**R. M. Maxwell et al.**

*Correspondence to:* R. M. Maxwell (rmaxwell@mines.edu)

- gmd-8-923-2015-supplement-cover-letter.pdf
- Readme.txt
- \_\_MACOSX
  - final-figures
    - \* .\_Figure9.png
    - \* .\_Figure1.png
    - \* .\_Figure10.png
    - \* .\_Figure11.png
    - \* .\_Figure2.png
    - \* .\_Figure3.png
    - \* .\_Figure4.png
    - \* .\_Figure5.png
    - \* .\_Figure7.pdf
    - \* .\_Figure8.pdf
- final-figures
  - Figure9.png
  - Figure1.png
  - Figure10.png
  - Figure11.png
  - Figure2.png
  - Figure3.png
  - Figure4.png
  - Figure5.eps
  - Figure5.png
  - Figure6.pdf
  - Figure7.pdf
  - Figure8.pdf
