# Supplementary figures and images for: A high-resolution simulation of groundwater and surface water over most of the continental US with the integrated hydrologic model ParFlow v3
Source: Copernicus journal article supplement (doi:10.5194/gmd-8-923-2015), 2015-03-31

**a. Water Table Depth**

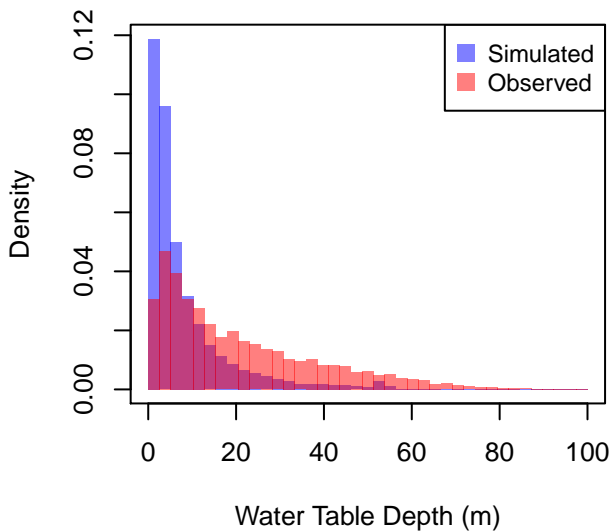

**b. Hydraulic Head**

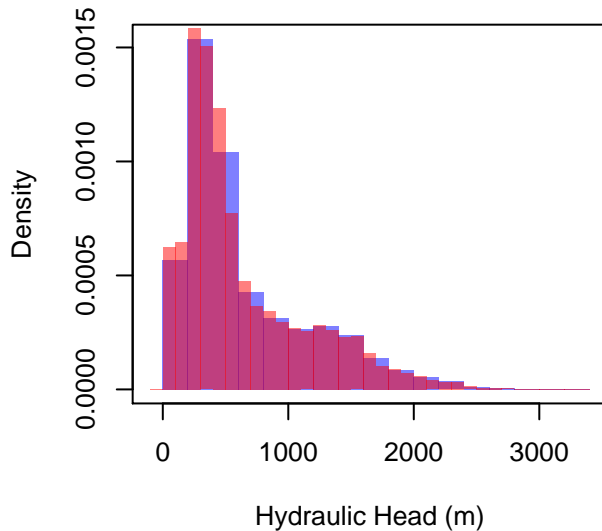

**c. Median Observed Flow**

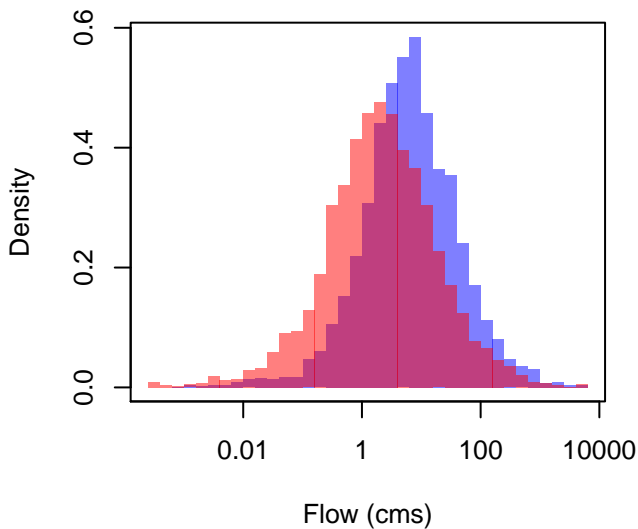

**d. 75 Percentile Observed Flow**

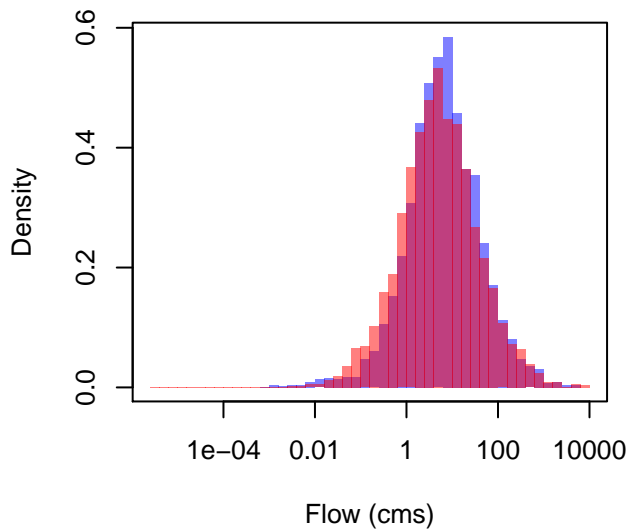

Supplement: Supplementary file 1 [file Figure6.pdf › final-figures/Figure6.pdf]
